# Supplementary material for: Characterization of Metal-Specific T-Cells in Inflamed Oral Mucosa in a Novel Murine Model of Chromium-Induced Allergic Contact Dermatitis
Source: MDPI journal article supplement (doi:10.3390/ijms24032807), 2023-02-01
Supplement: s1 [file s1]

## Supplementary Materials

| TRA Ranking Top1-30 of oral mucosa in the ACM Day3 |              |        |                       |        | TRA Ranking Top1-30 of oral mucosa in the ACM Day7 |               |        |                       |        |
|----------------------------------------------------|--------------|--------|-----------------------|--------|----------------------------------------------------|---------------|--------|-----------------------|--------|
| Rank                                               | TRAV         | TRAJ   | CDR3                  | %Reads | Rank                                               | TRAV          | TRAJ   | CDR3                  | %Reads |
| 1                                                  | TRAV6-7/DV9  | TRAJ32 | CALGLYGGSGNKLIF       | 1.60   | 1                                                  | TRAV12N-2     | TRAJ43 | CALSGNNNNAPRF         | 2.04   |
| 2                                                  | TRAV11D      | TRAJ18 | CVVGDRGSALGRLHF(iNKT) | 1.31   | 2                                                  | TRAV12-3      | TRAJ26 | CALSDFYAQGLTF         | 1.84   |
| 3                                                  | TRAV9-4      | TRAJ53 | CAVRSGGSNYKLTf        | 0.87   | 3                                                  | TRAV11D       | TRAJ18 | CVVGDRGSALGRLHF(iNKT) | 1.46   |
| 4                                                  | TRAV17       | TRAJ52 | CALNTGANTGKLTf        | 0.83   | 4                                                  | TRAV13D-2     | TRAJ12 | CAIGTGGYKVVf          | 1.38   |
| 5                                                  | TRAV1        | TRAJ33 | CAVRDSNYQLIW(MAIT)    | 0.74   | 5                                                  | TRAV12N-2     | TRAJ18 | CALRMDRGSALGRLHF      | 1.14   |
| 6                                                  | TRAV13N-4    | TRAJ40 | CAMEPPGNYKYVf         | 0.69   | 6                                                  | TRAV9-3       | TRAJ34 | CAMSNrDKVVf           | 1.11   |
| 7                                                  | TRAV10N      | TRAJ5  | CAASTGTQVVGQLTf       | 0.61   | 7                                                  | TRAV9-3       | TRAJ42 | CAVRLSGGSNAKLTf       | 1.09   |
| 8                                                  | TRAV6D-7     | TRAJ12 | CALrPGTGGYKVVf        | 0.59   | 8                                                  | TRAV1         | TRAJ33 | CAVRDSNYQLIW(MAIT)    | 1.03   |
| 9                                                  | TRAV3D-3     | TRAJ35 | CAVPTQTGFASALTf       | 0.56   | 9                                                  | TRAV7-3       | TRAJ30 | CAAHDTNAYKVIF         | 0.98   |
| 10                                                 | TRAV8-2      | TRAJ52 | CATDTGANTGKLTf        | 0.52   | 10                                                 | TRAV6-5       | TRAJ33 | CALSMDSNYQLIW         | 0.91   |
| 11                                                 | TRAV10       | TRAJ52 | CAASTGANTGKLTf        | 0.50   | 11                                                 | TRAV4D-3      | TRAJ30 | CAAAANAYKVIF          | 0.88   |
| 12                                                 | TRAV5-1      | TRAJ26 | CSASIFNYAQGLTf        | 0.49   | 12                                                 | TRAV8-2       | TRAJ42 | CATDPGGSNAKLTf        | 0.85   |
| 13                                                 | TRAV12N-2    | TRAJ27 | CALSNrNTGKLTf         | 0.48   | 13                                                 | TRAV9-4       | TRAJ34 | CAVSPVSNrDKVVf        | 0.75   |
| 14                                                 | TRAV4D-4     | TRAJ18 | CAAGRSALGRLHF         | 0.47   | 14                                                 | TRAV9D-4      | TRAJ9  | CALSArNMGYKLTf        | 0.72   |
| 15                                                 | TRAV10       | TRAJ39 | CAARNNNAGAKLTf        | 0.47   | 15                                                 | TRAV14D-3/DV8 | TRAJ31 | CAANNrNRIFF           | 0.68   |
| 16                                                 | TRAV13-3     | TRAJ49 | CATGYQNYF             | 0.46   | 16                                                 | TRAV4-4/DV10  | TRAJ18 | CAADDRGSALGRLHF       | 0.68   |
| 17                                                 | TRAV7D-2     | TRAJ37 | CAADPTTGNTRKLTf       | 0.44   | 17                                                 | TRAV4-2       | TRAJ52 | CAAAANTGANTGKLTf      | 0.68   |
| 18                                                 | TRAV7D-2     | TRAJ30 | CAAKDTNAYKVIF         | 0.42   | 18                                                 | TRAV14D-3/DV8 | TRAJ21 | CAASSYNVLYF           | 0.67   |
| 19                                                 | TRAV6-1      | TRAJ11 | CVLGDDSGYNKLTf        | 0.40   | 19                                                 | TRAV13D-1     | TRAJ24 | CPTASLGKLQF           | 0.66   |
| 20                                                 | TRAV6-5      | TRAJ33 | CALRMDSNYQLIW         | 0.40   | 20                                                 | TRAV5-1       | TRAJ13 | CSASANSrGTYQRF        | 0.66   |
| 21                                                 | TRAV13D-2    | TRAJ30 | CAIDRITNAYKVIF        | 0.40   | 21                                                 | TRAV14-1      | TRAJ43 | CAASGNNNNAPRF         | 0.63   |
| 22                                                 | TRAV4-3      | TRAJ32 | CAADYGGSGNKLIF        | 0.39   | 22                                                 | TRAV10N       | TRAJ13 | CAARNSGTYQRF          | 0.63   |
| 23                                                 | TRAV4D-3     | TRAJ39 | CASENRNAGAKLTf        | 0.39   | 23                                                 | TRAV1         | TRAJ32 | CASYGGSGNKLIF         | 0.62   |
| 24                                                 | TRAV7-5      | TRAJ22 | CAMSPASSGSWQLIF       | 0.38   | 24                                                 | TRAV12-3      | TRAJ22 | CALSASSGSWQLIF        | 0.61   |
| 25                                                 | TRAV13-1     | TRAJ43 | CAINNNNAPRF           | 0.38   | 25                                                 | TRAV5-4       | TRAJ27 | CAASATNTGKLTf         | 0.53   |
| 26                                                 | TRAV7D-2     | TRAJ27 | CAASDTNTGKLTf         | 0.37   | 26                                                 | TRAV9D-4      | TRAJ34 | CAMSNrDKVVf           | 0.53   |
| 27                                                 | TRAV8-2      | TRAJ26 | CATEHNYAQGLTf         | 0.37   | 27                                                 | TRAV4D-3      | TRAJ24 | CAAEAAASLGKLQF        | 0.53   |
| 28                                                 | TRAV7D-5     | TRAJ52 | CAVNTGANTGKLTf        | 0.36   | 28                                                 | TRAV12N-2     | TRAJ13 | CALSEHSGTYQRF         | 0.51   |
| 29                                                 | TRAV13D-1    | TRAJ35 | CAMEGFASALTf          | 0.36   | 29                                                 | TRAV13D-2     | TRAJ40 | CAIDRTGNKYVf          | 0.49   |
| 30                                                 | TRAV16D/DV11 | TRAJ48 | CAMREGPDYGNKITf       | 0.36   | 30                                                 | TRAV14D-3/DV8 | TRAJ30 | CAASGSTNAYKVIF        | 0.49   |

**Figure S1. Top 30 ranking read numbers of TRA clonotypes in the oral mucosa of ACM mice at Days 3 and 7 post-challenge.** The distributions of %reads of amino acid sequences of CDR3 regions in the ACM mice showed that the shared iNKT cells (green shading) and MAIT cells (blue shading) in the oral mucosa of ACM mice at Days 3 and 7.

| TRB Ranking Top1-30 of oral mucosa in the ACM Day1 |          |         |                   | TRB Ranking Top1-30 of oral mucosa in the ACM Day3 |      |          |         | TRB Ranking Top1-30 of oral mucosa in the ACM Day7 |        |      |          |         |                   |        |
|----------------------------------------------------|----------|---------|-------------------|----------------------------------------------------|------|----------|---------|----------------------------------------------------|--------|------|----------|---------|-------------------|--------|
| Rank                                               | TRBV     | TRBJ    | CDR3              | %Reads                                             | Rank | TRBV     | TRBJ    | CDR3                                               | %Reads | Rank | TRBV     | TRBJ    | CDR3              | %Reads |
| 1                                                  | TRBV4    | TRBJ2-3 | CASSRGS AETLYF    | 0.89                                               | 1    | TRBV1    | TRBJ1-4 | CTCSPGQKNERLFF                                     | 1.47   | 1    | TRBV29   | TRBJ2-4 | CASGTGNTLYF       | 1.84   |
| 2                                                  | TRBV13-3 | TRBJ2-2 | CASSRDNRTGQLYF    | 0.62                                               | 2    | TRBV5    | TRBJ1-4 | CASSQAGGNTERLFF                                    | 1.19   | 2    | TRBV13-2 | TRBJ2-1 | CASGDKGGAEQFF     | 0.77   |
| 3                                                  | TRBV1    | TRBJ1-6 | CTCSADSYNSPLYF    | 0.57                                               | 3    | TRBV19   | TRBJ1-1 | CASIRTEVTEFF                                       | 0.97   | 3    | TRBV29   | TRBJ1-2 | CASSLGQGNNDYTF    | 0.71   |
| 4                                                  | TRBV31   | TRBJ1-1 | CAWTGTPNTEVFF     | 0.57                                               | 4    | TRBV31   | TRBJ1-6 | CAWRIGGYNSPLYF                                     | 0.70   | 4    | TRBV5    | TRBJ2-3 | CASSPGQGAETLYF    | 0.70   |
| 5                                                  | TRBV29   | TRBJ1-4 | CASSFDNERLFF      | 0.55                                               | 5    | TRBV14   | TRBJ2-3 | CASSFEETLYF                                        | 0.68   | 5    | TRBV4    | TRBJ2-3 | CASSFRDWWGPETLYF  | 0.70   |
| 6                                                  | TRBV13-2 | TRBJ2-5 | CASGDARGDTQYF     | 0.46                                               | 6    | TRBV17   | TRBJ2-5 | CASSREEDTQYF                                       | 0.57   | 6    | TRBV5    | TRBJ1-1 | CASSHRDRGRTVEVFF  | 0.67   |
| 7                                                  | TRBV29   | TRBJ2-2 | CASSFRTGNTGQLYF   | 0.45                                               | 7    | TRBV13-1 | TRBJ2-7 | CASSFPGGAREQYF                                     | 0.57   | 7    | TRBV13-3 | TRBJ2-1 | CASSSETGGFAEQFF   | 0.66   |
| 8                                                  | TRBV29   | TRBJ2-7 | CASSWQGVQYF       | 0.40                                               | 8    | TRBV1    | TRBJ2-5 | CTCSARLGQDQYF                                      | 0.55   | 8    | TRBV5    | TRBJ1-1 | CASSQGANTEVFF     | 0.65   |
| 9                                                  | TRBV5    | TRBJ1-4 | CASSQEPGTGPNERLFF | 0.37                                               | 9    | TRBV13-2 | TRBJ1-3 | CASQNGSGNTLYF                                      | 0.53   | 9    | TRBV5    | TRBJ2-3 | CASSQEGGRGAETLYF  | 0.52   |
| 10                                                 | TRBV29   | TRBJ2-4 | CGGGGVQNTLYF      | 0.35                                               | 10   | TRBV19   | TRBJ1-1 | CASSMEGTEVFF                                       | 0.49   | 10   | TRBV5    | TRBJ1-1 | CASSRQCNTVEVFF    | 0.48   |
| 11                                                 | TRBV16   | TRBJ1-2 | CASSLGNSDYTF      | 0.33                                               | 11   | TRBV13-3 | TRBJ2-5 | CASSDWGDTQYF                                       | 0.46   | 11   | TRBV29   | TRBJ1-1 | CASSPQANTEVFF     | 0.48   |
| 12                                                 | TRBV31   | TRBJ1-5 | CAWSPPGQGNQAPLF   | 0.32                                               | 12   | TRBV5    | TRBJ1-5 | CASSQDGGKRNNAF                                     | 0.45   | 12   | TRBV5    | TRBJ2-5 | CASSQDLNRADQDTQYF | 0.44   |
| 13                                                 | TRBV1    | TRBJ2-2 | CTCSAPGANTGQLYF   | 0.32                                               | 13   | TRBV26   | TRBJ1-2 | CASSLDNSDYTF                                       | 0.44   | 13   | TRBV5    | TRBJ2-5 | CASSPTGGGQDQYF    | 0.43   |
| 14                                                 | TRBV29   | TRBJ2-4 | CASSLGGRYQNTLYF   | 0.31                                               | 14   | TRBV5    | TRBJ2-5 | CASSRDWDQDTQYF                                     | 0.39   | 14   | TRBV5    | TRBJ2-1 | CASSQGLGGPYAEQFF  | 0.43   |
| 15                                                 | TRBV19   | TRBJ1-6 | CASSIDREYSPLYF    | 0.30                                               | 15   | TRBV1    | TRBJ2-7 | CTCSADNYEQYF                                       | 0.38   | 15   | TRBV14   | TRBJ1-4 | CASSGQGPRLFF      | 0.42   |
| 16                                                 | TRBV3    | TRBJ2-7 | CASSLDGGEQYF      | 0.30                                               | 16   | TRBV13-2 | TRBJ2-7 | CASGEPGARQYF                                       | 0.38   | 16   | TRBV13-2 | TRBJ1-2 | CASGDAQANSDYTF    | 0.39   |
| 17                                                 | TRBV13-1 | TRBJ2-2 | CASSRQATQQLYF     | 0.30                                               | 17   | TRBV5    | TRBJ1-1 | CASSQGANTEVFF                                      | 0.36   | 17   | TRBV20   | TRBJ1-4 | CGAREQFNERLFF     | 0.38   |
| 18                                                 | TRBV19   | TRBJ1-3 | CASSAQNTLYF       | 0.30                                               | 18   | TRBV29   | TRBJ2-5 | CASSSSCLGEDTQYF                                    | 0.35   | 18   | TRBV19   | TRBJ2-4 | CASSVTGNTLYF      | 0.37   |
| 19                                                 | TRBV5    | TRBJ2-7 | CASSQDSRVREQYF    | 0.29                                               | 19   | TRBV5    | TRBJ1-4 | CASSQARQQGGERLFF                                   | 0.34   | 19   | TRBV5    | TRBJ2-5 | CASSPQLGQDTQYF    | 0.37   |
| 20                                                 | TRBV29   | TRBJ1-4 | CASSLAGRGNERLFF   | 0.29                                               | 20   | TRBV13-1 | TRBJ1-4 | CASSDGRDRGNERLFF                                   | 0.34   | 20   | TRBV29   | TRBJ1-3 | CASSRGTCAGNTLYF   | 0.36   |
| 21                                                 | TRBV5    | TRBJ2-2 | CASSQTGTGQLYF     | 0.29                                               | 21   | TRBV13-2 | TRBJ1-6 | CASGDPNRTPLYF                                      | 0.33   | 21   | TRBV1    | TRBJ2-3 | CTCSQCAETLYF      | 0.35   |
| 22                                                 | TRBV4    | TRBJ1-4 | CASSYTGFSNERLFF   | 0.28                                               | 22   | TRBV14   | TRBJ1-6 | CASSPPTGNHNSPLYF                                   | 0.32   | 22   | TRBV19   | TRBJ2-2 | CASSAGRNTGQLYF    | 0.34   |
| 23                                                 | TRBV1    | TRBJ1-4 | CTCSAGQKNERLFF    | 0.28                                               | 23   | TRBV4    | TRBJ2-1 | CASSYWGGAGAEQFF                                    | 0.31   | 23   | TRBV20   | TRBJ1-1 | CGASWGNTEVFF      | 0.34   |
| 24                                                 | TRBV13-2 | TRBJ2-3 | CASGTGASAEITLYF   | 0.28                                               | 24   | TRBV4    | TRBJ1-4 | CASSFRDRGNERLFF                                    | 0.31   | 24   | TRBV13-3 | TRBJ2-3 | CASSASGLGGAETLYF  | 0.34   |
| 25                                                 | TRBV31   | TRBJ2-7 | CAWSPTGTGGYEQYF   | 0.28                                               | 25   | TRBV13-3 | TRBJ1-3 | CASSDAWTNSGNTLYF                                   | 0.30   | 25   | TRBV13-2 | TRBJ2-4 | CASGEPAGGNTLYF    | 0.32   |
| 26                                                 | TRBV19   | TRBJ2-1 | CASSMGTVAEQFF     | 0.26                                               | 26   | TRBV3    | TRBJ2-5 | CASSRDWGDQYF                                       | 0.29   | 26   | TRBV29   | TRBJ1-4 | CASSRRQGSFNERLFF  | 0.32   |
| 27                                                 | TRBV15   | TRBJ2-1 | CASSWGLDWENYAEQ   | 0.26                                               | 27   | TRBV13-3 | TRBJ2-3 | CASSDVAGGAETLYF                                    | 0.29   | 27   | TRBV14   | TRBJ2-1 | CASSLRGGYAEQFF    | 0.32   |
| 28                                                 | TRBV19   | TRBJ2-7 | CASPTGSSYEQYF     | 0.26                                               | 28   | TRBV13-3 | TRBJ2-4 | CASSGGGQLYF                                        | 0.28   | 28   | TRBV13-2 | TRBJ1-3 | CASGDSNGNTLYF     | 0.32   |
| 29                                                 | TRBV5    | TRBJ1-1 | CASSQEGTGTTEVFF   | 0.26                                               | 29   | TRBV4    | TRBJ1-3 | CASSLGPSGNTLYF                                     | 0.28   | 29   | TRBV29   | TRBJ2-4 | CASSLNKNTLYF      | 0.30   |
| 30                                                 | TRBV29   | TRBJ1-5 | CASSFQGTNDNQAPLF  | 0.26                                               | 30   | TRBV31   | TRBJ2-7 | CAWSLVGTGAEQYF                                     | 0.28   | 30   | TRBV13-2 | TRBJ1-1 | CASGDYNTVEVFF     | 0.30   |

**Figure S2. Top 30 ranking read numbers of TRB clonotypes in the oral mucosa of ACM mice at Days 1, 3, and 7 post-challenge.** The Figure showed that the distributions of %reads of amino acid sequences of CDR3 regions of in the ACM mice at Days 3 and 7 post-challenge. There was no shared TRB clone at Days 1,3, and 7 in the oral mucosa of ACM mice.
